# Supplementary material for: MOG-IgG-associated disease has a stereotypical clinical course, asymptomatic visual impairment and good treatment response
Source: PubMed Central journal article supplement — Mult Scler J Exp Transl Clin. 2018 Jul 17;4(3):2055217318787829. doi: 10.1177/2055217318787829 (PMC6050870; doi:10.1177/2055217318787829), 2018-07-17

## SUPPLEMENTARY TABLES

Table 1- Non MS demyelinating diseases (n=235)

|                                   | Seronegative | Anti AQP4 - IgG + | Anti MOG – IgG+ |
|-----------------------------------|--------------|-------------------|-----------------|
| ADEM                              | 12           |                   | 2               |
| Bilateral OPN                     | 8            |                   | 2               |
| LETM                              | 41           |                   | 14              |
| NMOSD                             | 38           | 41                | 8               |
| RON                               | 18           | 2                 | 13              |
| RTM                               | 11           | 8                 | 3               |
| Conus Myelitis                    | 4            | 0                 | 0               |
| Recurrent brainstem demyelination | 4            | 0                 | 0               |
| Tumefactive demyelination         | 6            | 0                 | 0               |
| Total                             | 142          | 51                | 42              |

Table 2- Mangalore demyelinating disease registry protocol

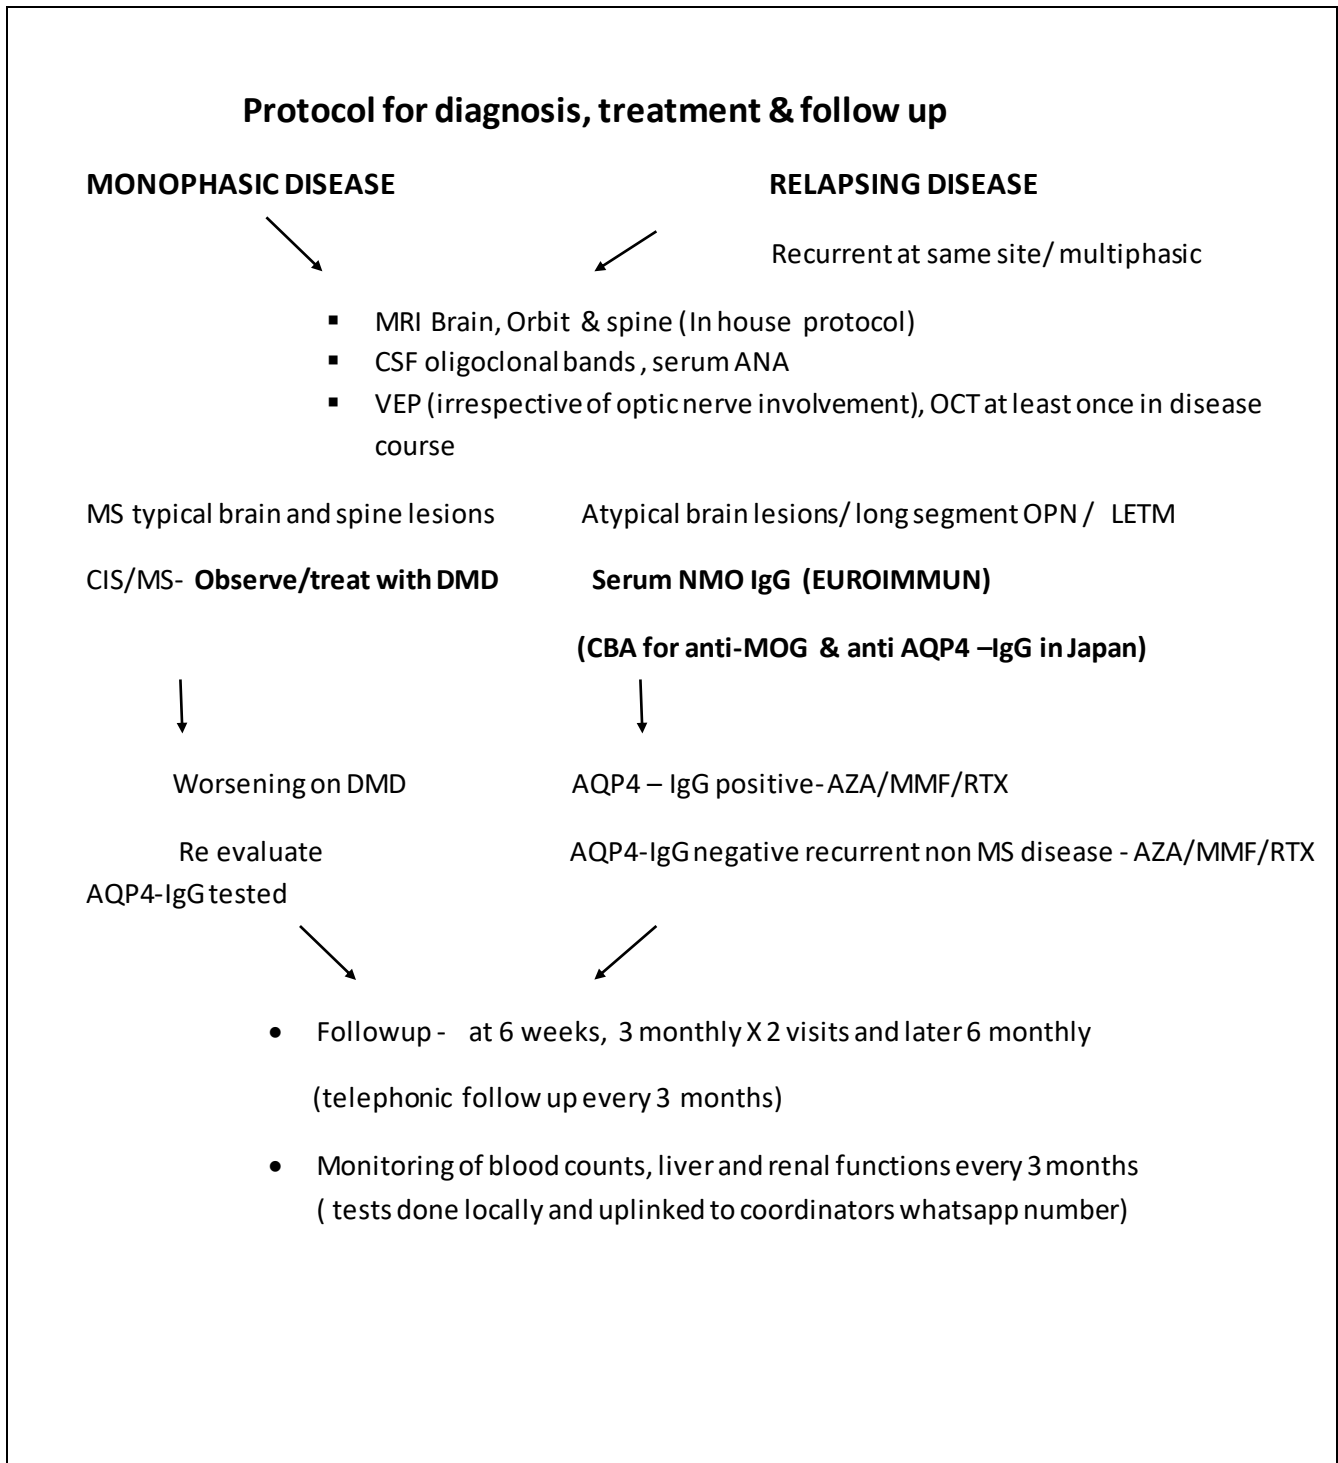

Supplement: Supplemental_material.pdf [file Supplemental_material.pdf]
